# Supplementary figures and images for: Remimazolam Anaphylaxis during Induction of General Anesthesia Confirmed by Provocation Test—A Case Report and Literature Review
Source: MDPI journal article supplement (doi:10.3390/medicina59111915), 2023-10-30

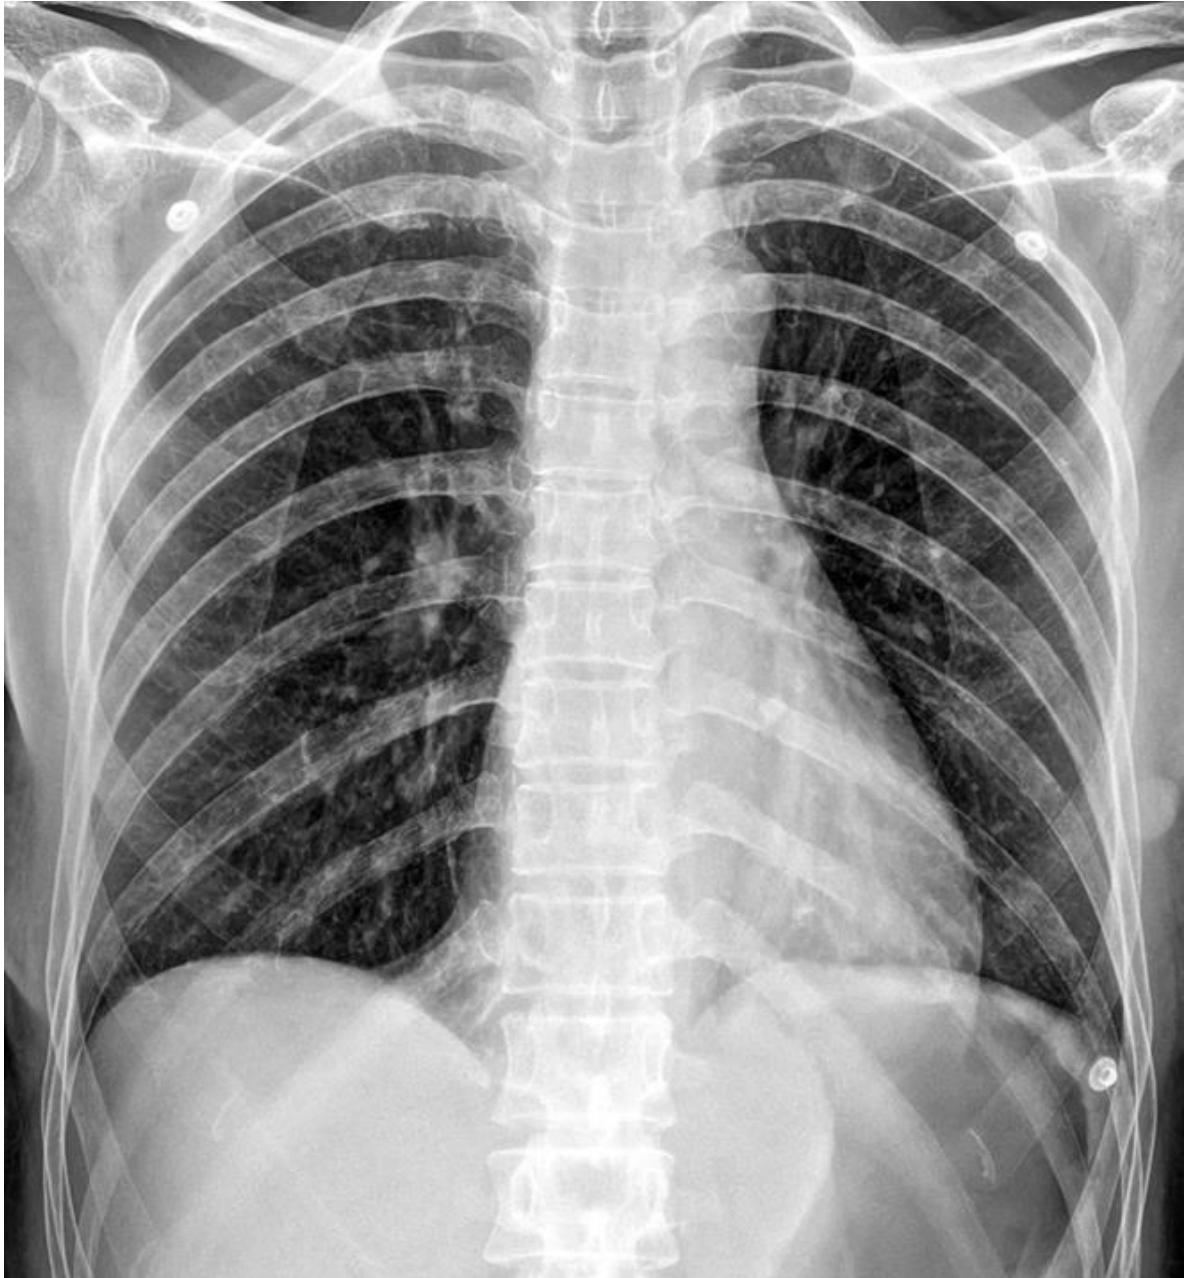

**Figure S1.** The patient's chest radiography in the intensive care unit after anaphylaxis.

Supplement: s1 [file s1]
